# Supplementary material for: Coronary-Heart-Disease-Associated Genetic Variant at the COL4A1/COL4A2 Locus Affects COL4A1/COL4A2 Expression, Vascular Cell Survival, Atherosclerotic Plaque Stability and Risk of Myocardial Infarction
Source: PLOS journal article supplement (doi:10.1371/journal.pgen.1006127), 2016-07-07
Supplement: S1 (10.1371/journal.pgen.1006127.s001) [file journal.pgen.1006127.s001]

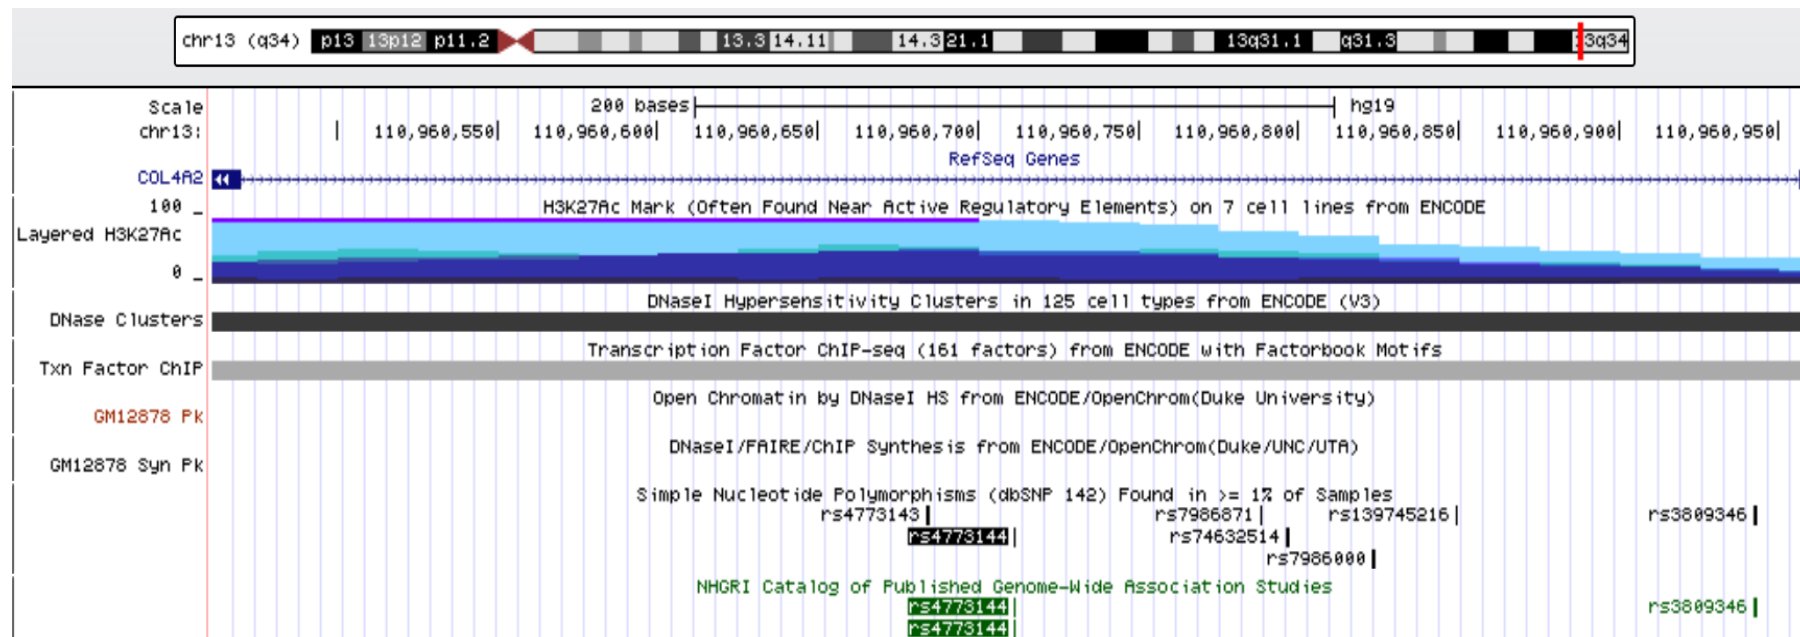

**S1 Fig. Results of Bioinformatics Analysis of SNP rs4773144: Data from the ENCODE Project.**

A bioinformatics analysis with the use of the UCSC Genome Browser showed that SNP rs4773144, and 3 other SNPs (rs4773143, rs7986871 and rs3809346) in strong linkage disequilibrium ( $r^2 > 0.8$ ) with it, are located in a genomic region that has important transcriptional regulatory features including DNase I hypersensitivity and H3k27Ac marks, identified by the ENCODE project.
