# Supplementary material for: Coronary-Heart-Disease-Associated Genetic Variant at the COL4A1/COL4A2 Locus Affects COL4A1/COL4A2 Expression, Vascular Cell Survival, Atherosclerotic Plaque Stability and Risk of Myocardial Infarction
Source: PLOS journal article supplement (doi:10.1371/journal.pgen.1006127), 2016-07-07
Supplement: S4 (10.1371/journal.pgen.1006127.s004) [file journal.pgen.1006127.s004]

# Data supporting chr13:110960711 (rs4773144)

Score: 2b

Likely to affect binding

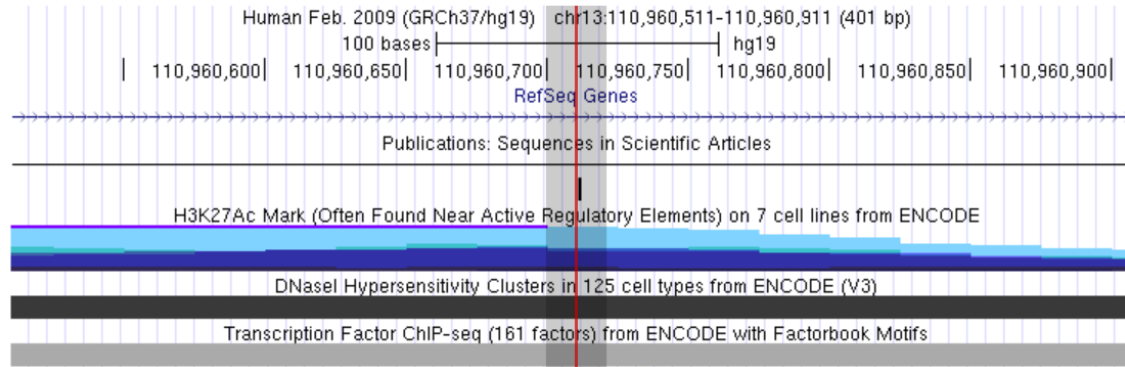

| Protein Binding <span>Filter: <input type="text"/></span> |                            |               |               |                 |                        |
|-----------------------------------------------------------|----------------------------|---------------|---------------|-----------------|------------------------|
| Method                                                    | Location                   | Bound Protein | ? Cell Type   | Additional Info | Reference              |
| ChIP-seq                                                  | chr13:110960617..110961033 | POLR2A        | HUVEC         |                 | <a href="#">ENCODE</a> |
| ChIP-seq                                                  | chr13:110960607..110961147 | POLR2A        | MCF10A-Er-Src | 01pct           | <a href="#">ENCODE</a> |
| ChIP-seq                                                  | chr13:110960657..110961027 | POLR2A        | ProgFib       |                 | <a href="#">ENCODE</a> |
| ChIP-seq                                                  | chr13:110959966..110960876 | EZH2          | H1-hESC       |                 | <a href="#">ENCODE</a> |

| Motifs <span>Filter: <input type="text"/></span> |                            |             |             |     |                          |
|--------------------------------------------------|----------------------------|-------------|-------------|-----|--------------------------|
| Method                                           | Location                   | Motif       | ? Cell Type | PWM | Reference                |
| Footprinting                                     | chr13:110960702..110960716 | STAT3:STAT3 | Gliobla     |     | <a href="#">21106904</a> |
| Footprinting                                     | chr13:110960702..110960716 | STAT3:STAT3 | H1hesc      |     | <a href="#">21106904</a> |
| PWM                                              | chr13:110960702..110960716 | STAT3:STAT3 |             |     | <a href="#">16381825</a> |

## S4 Fig. Results of Bioinformatics Analysis of SNP rs4773144: Data from RegulomeDB.

Data from RegulomeDB show that SNP rs4773144 (position indicated by vertical red line) and 3 other SNPs (rs4773143, rs7986871 and rs3809346) in strong linkage disequilibrium ( $r^2 > 0.8$ ) with it, are located in a genomic region with binding of the RNA polymerase II POLR2A subunit and transcription factors, detected by the ENCODE project, and that the DNA sequence at the rs4773144 site shares similarity with the consensus binding element of the transcription factor STAT3.
